# Supplementary material for: Magnetically retrievable lepidocrocite supported copper oxide nanocatalyst (Fe–CuO) for N-arylation of imidazole
Source: Royal Society of Chemistry journal article supplement (doi:10.1039/c4ra13256d), 2015-01-01
Supplement: c4ra13256d1.pdf [file c4ra13256d1.pdf]

5

10

### Electronic Supplementary Information

## Magnetically Retrievable Lepidocrocite Supported Copper Oxide Nanocatalyst (Fe–CuO) for N-Arylation of Imidazole

R. Sivakami<sup>a</sup>, S. Ganesh Babu<sup>c</sup>, S. Dhanuskodi<sup>\*a</sup>, R. Karvembu<sup>\*b</sup>

15

<sup>a</sup> School of Physics, Bharathidasan University, Tiruchirappalli 620 024, India

<sup>b</sup> Department of Chemistry, National Institute of Technology, Tiruchirappalli 620 015, India

<sup>c</sup> SRM Research Institute, SRM University, Kattankulathur 603203, Chennai, Tamilnadu, India

20

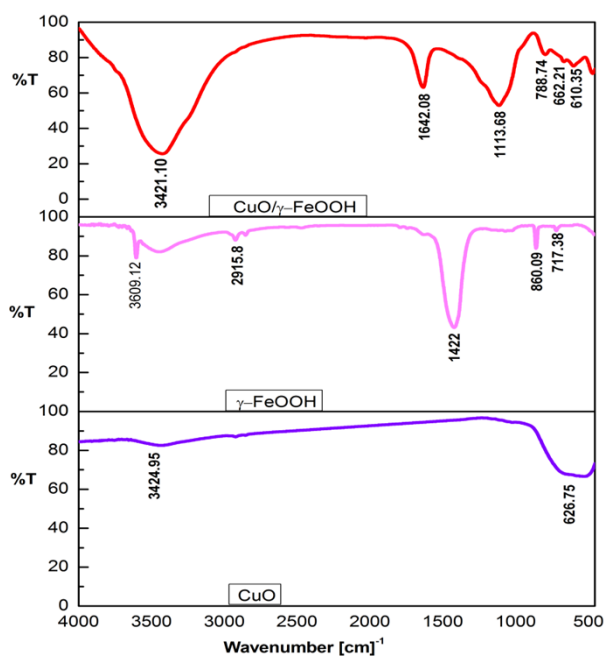

Fig. S1 FT-IR patterns of CuO,  $\gamma$ -FeOOH, and Fe – CuO.

25

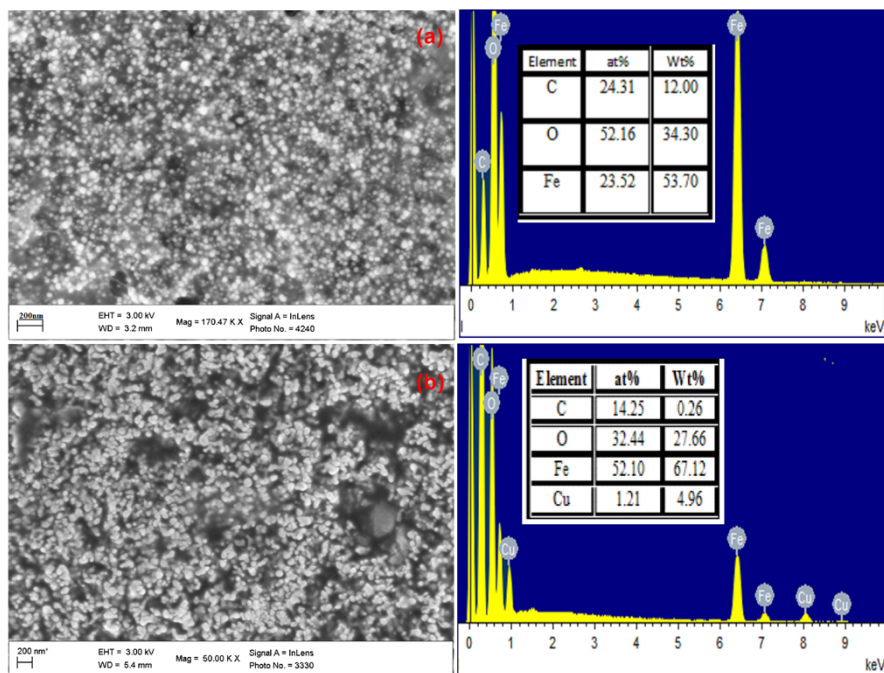

Fig. S2 SEM-EDAX micrographs of (a)  $\gamma$ -FeOOH and (b) Fe-CuO

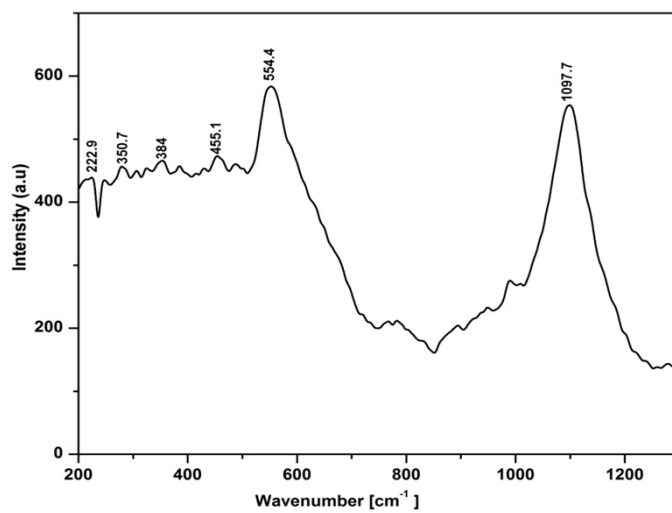

Fig. S3 Raman spectrum of Fe-CuO catalyst

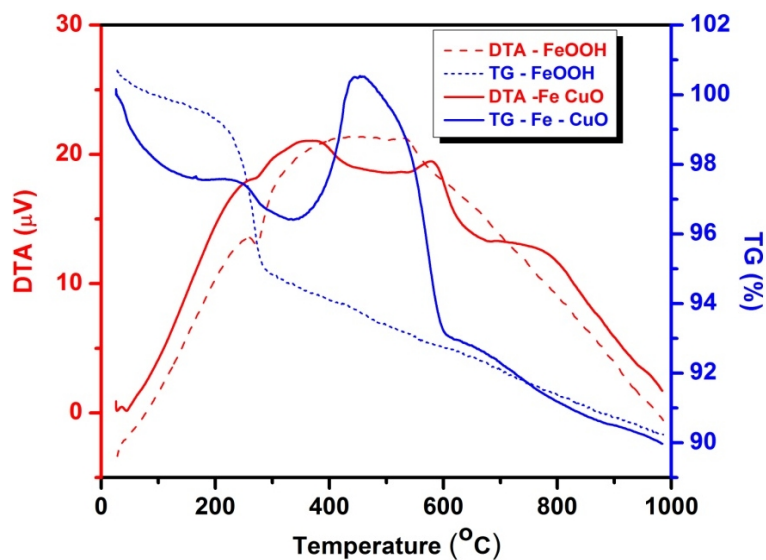

Fig. S4 TG/DTA curves of (a) pure  $\gamma$ -FeOOH and (b) Fe-CuO catalyst.

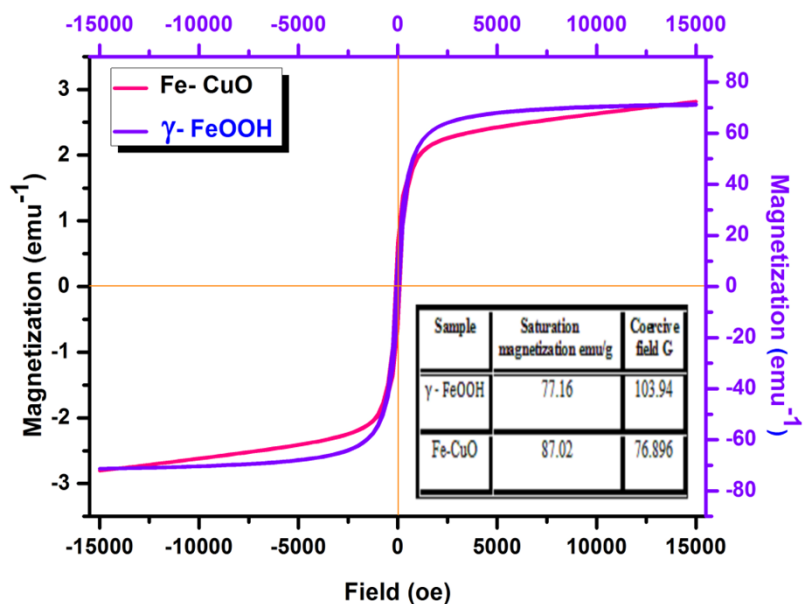

5

Fig. S5 Magnetization curves of (a) pure  $\gamma$ -FeOOH and (b) Fe-CuO [inset: magnetization (Ms) and coercivity (Hc) table].

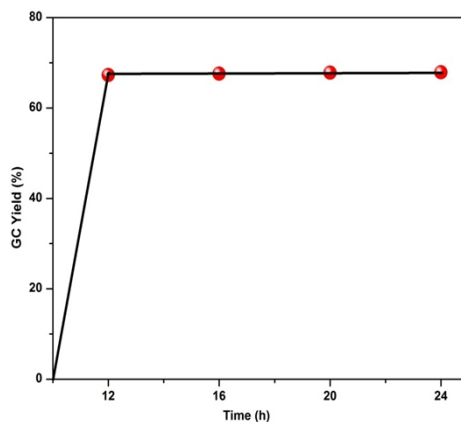

**Fig. S6** Heterogeneity test of Fe-CuO for N-arylation of imidazole with 4-bromobenzonitrile [reaction conditions: 1.mmol (81 mg) of imidazole, 1mmol (182 mg) of 4-bromo benzonitrile, 2 mmol (276mg) of  $K_2CO_3$ , and 10 mg of Fe-CuO in 4 mL of DMAc at 120 °C].

5

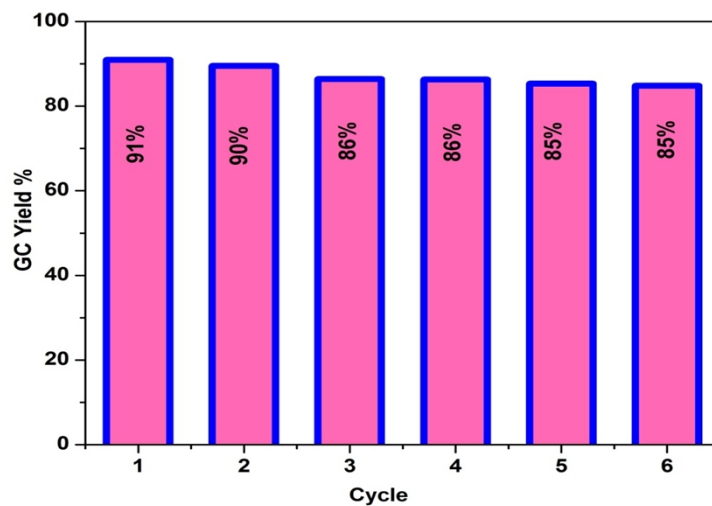

**10 Fig. S7** Reusability of Fe-CuO nanocatalyst for N-arylation of imidazole with 4-bromobenzonitrile [reaction conditions: 1.2 mmol (81 mg) of imidazole, 1mmol(182 mg) of 4-bromobenzonitrile, 2 mmol (276 mg) of  $K_2CO_3$ , and 10 mg of Fe-CuO in 4 mL of DMAc at 120 °C].

15

5

**NMR spectra of representative products**

NMR spectra were obtained on a 400 MHz Bruker spectrometer in CDCl<sub>3</sub> using TMS as a standard.

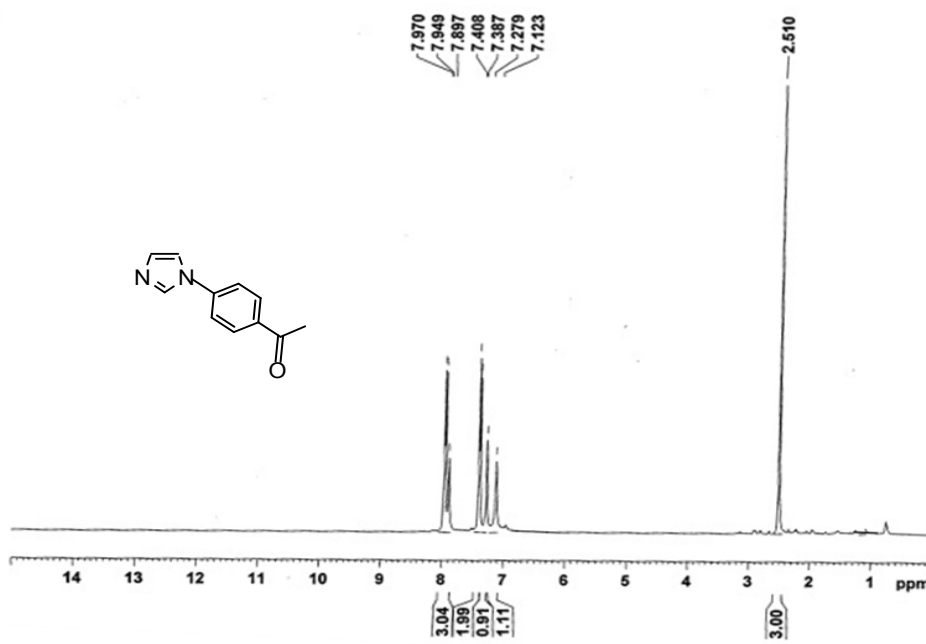

10

**Fig. S8** 1-(4-Imidazol-1-ylphenyl)ethanone (Table 3, entry 3).

<sup>1</sup>H NMR (400 MHz, CDCl<sub>3</sub>): δ, ppm 7.99-7.90 (t, J = 8.0Hz, 4H), 7.42-7.37 (d, J = 6.0Hz, 2H), 7.10 (s, 1H), 2.56 (s, 3H).

15

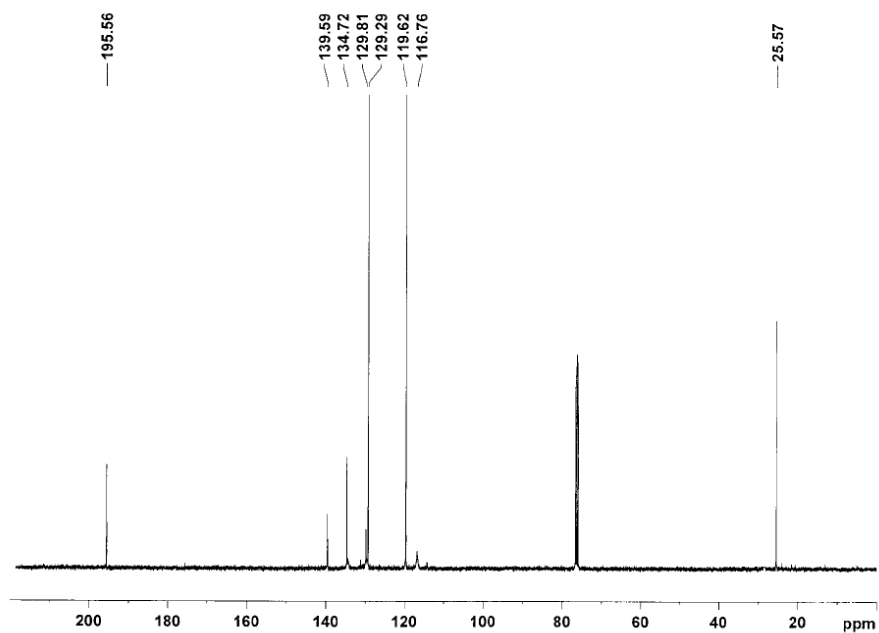

5

**Fig. S9** 1-(4-Imidazol-1-ylphenyl) ethanone (Table 3, entry 3).

$^{13}\text{C}$  NMR (100 MHz,  $\text{CDCl}_3$ ):  $\delta$ , ppm 195.6, 139.5, 134.7, 129.8, 129.3, 119.6, 116.8, 25.6.

10

15

**GC Conditions:**

GC (Shimadzu-2010) is equipped with 5% diphenyl and 95% dimethyl siloxane, Restek capillary column (60 m length, 0.32 mm dia) 5 and a flame ionization detector (FID). The column temperature was 220°C. The temperatures of the injection port and FID were kept constant at 250°C and 280°C, respectively during product analysis.

**GC DATA**

**1. Condensation of 4-bromobenzonitrile and imidazole (Table 3, entry 13) with pure  $\gamma$ -FeOOH catalyst**

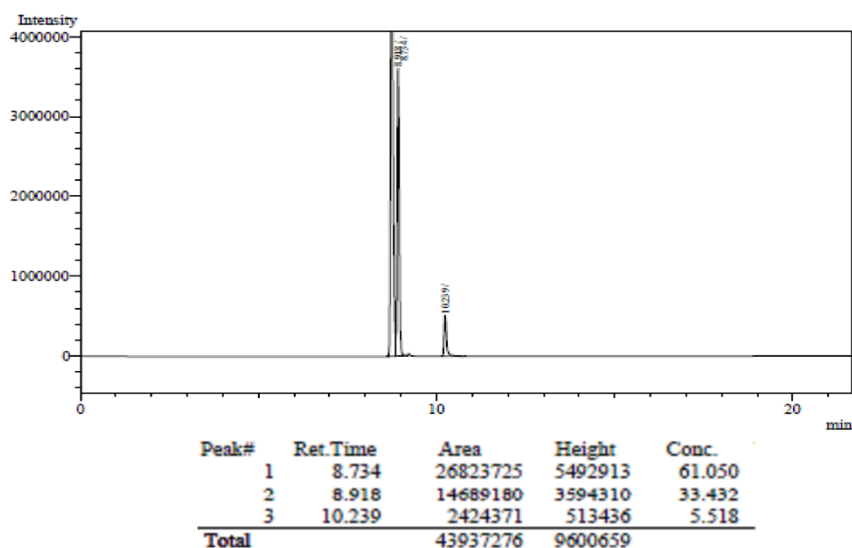

10

**Fig. S10** Condensation of 4-bromobenzonitrile and imidazole

**Table 1** Results of BET surface area measurements for Fe-CuO nanocatalyst

| Sample                            | BET surface area (m <sup>2</sup> g <sup>-1</sup> ) | Single point adsorption total pore volume (cm <sup>3</sup> g <sup>-1</sup> ) |
|-----------------------------------|----------------------------------------------------|------------------------------------------------------------------------------|
| Fe-CuO as prepared                | 83.1989                                            | 0.419177                                                                     |
| Fe-CuO calcined at 500 °C for 3 h | 50.3123                                            | 0.224613                                                                     |

15
